# Supplementary material for: Annotating long intergenic non-coding RNAs under artificial selection during chicken domestication
Source: PubMed Central journal article supplement (PMC5558714; doi:10.1186/s12862-017-1036-6), 2017-08-15

Sample dendrogram

0 50 100 150 200 250 300

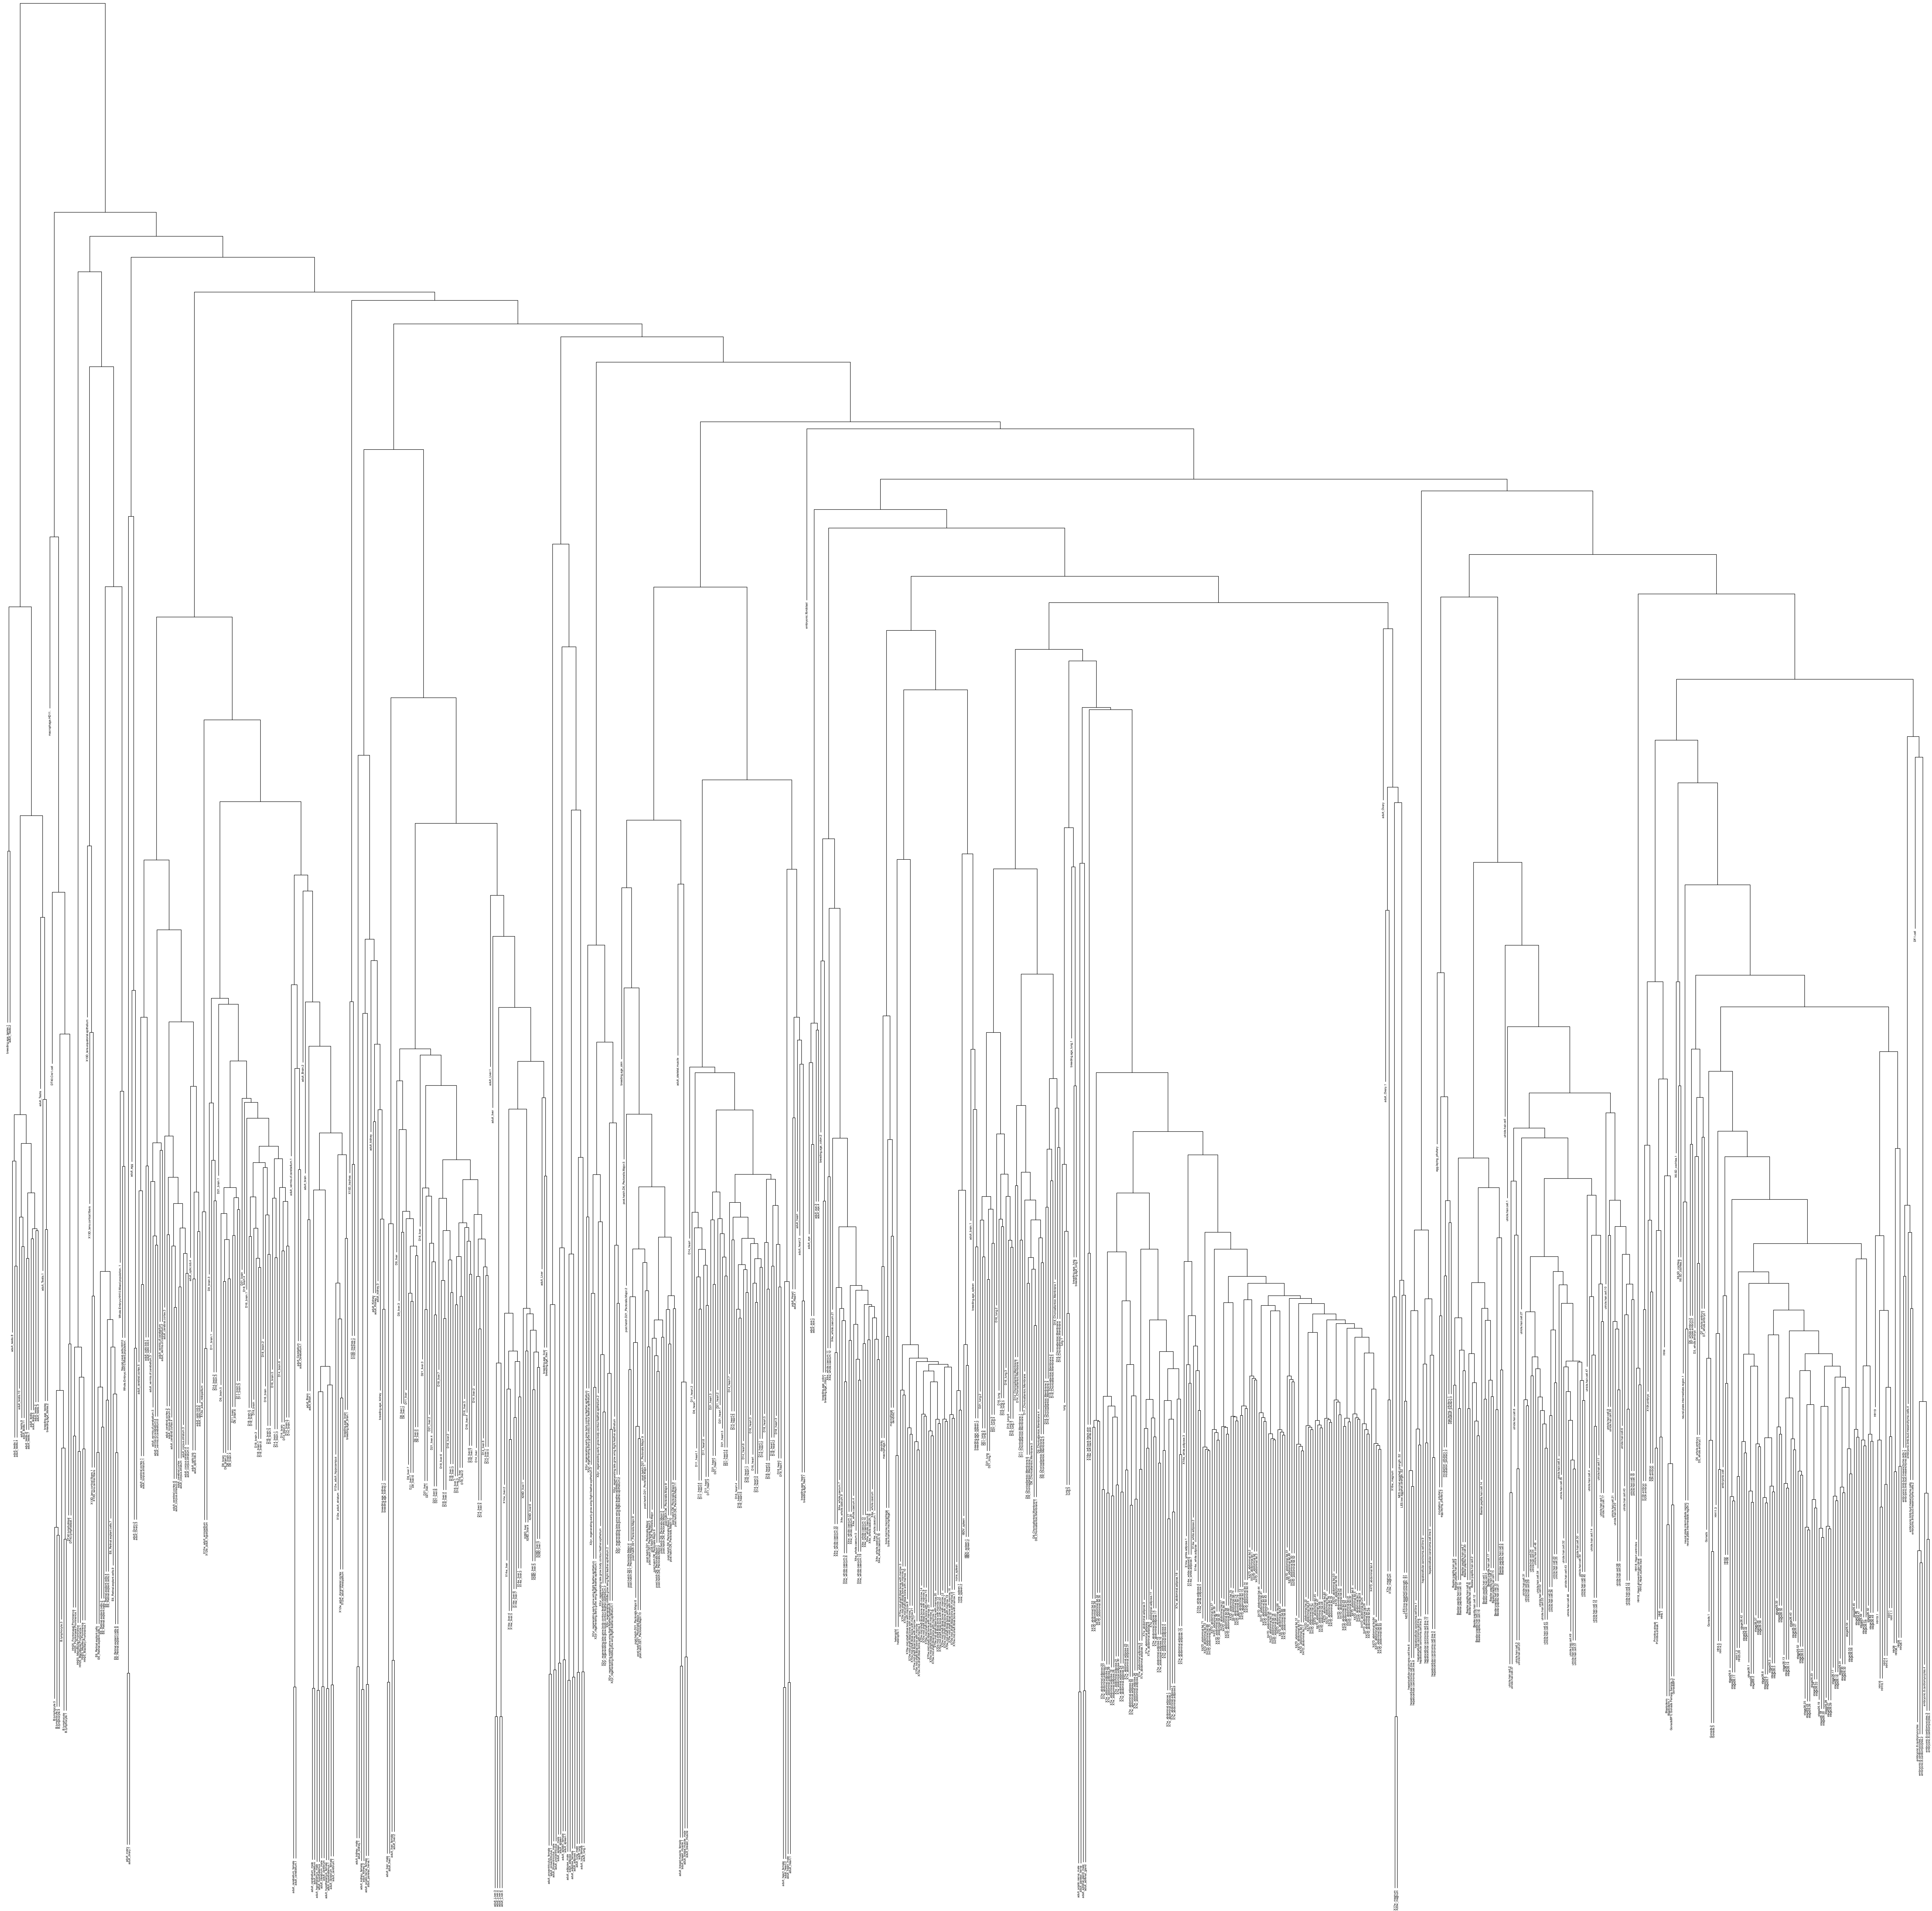

Supplement: 12862_2017_1036_MOESM3_ESM.pdf [file 12862_2017_1036_MOESM3_ESM.pdf]
